# Supplementary figures and images for: Investigation of the role of in-plane stress behavior on ferroelectric properties of scaled-up hafnium zirconium oxide superlattices
Source: Royal Society of Chemistry journal article supplement (doi:10.1039/d4nr05053c), 2025-01-01

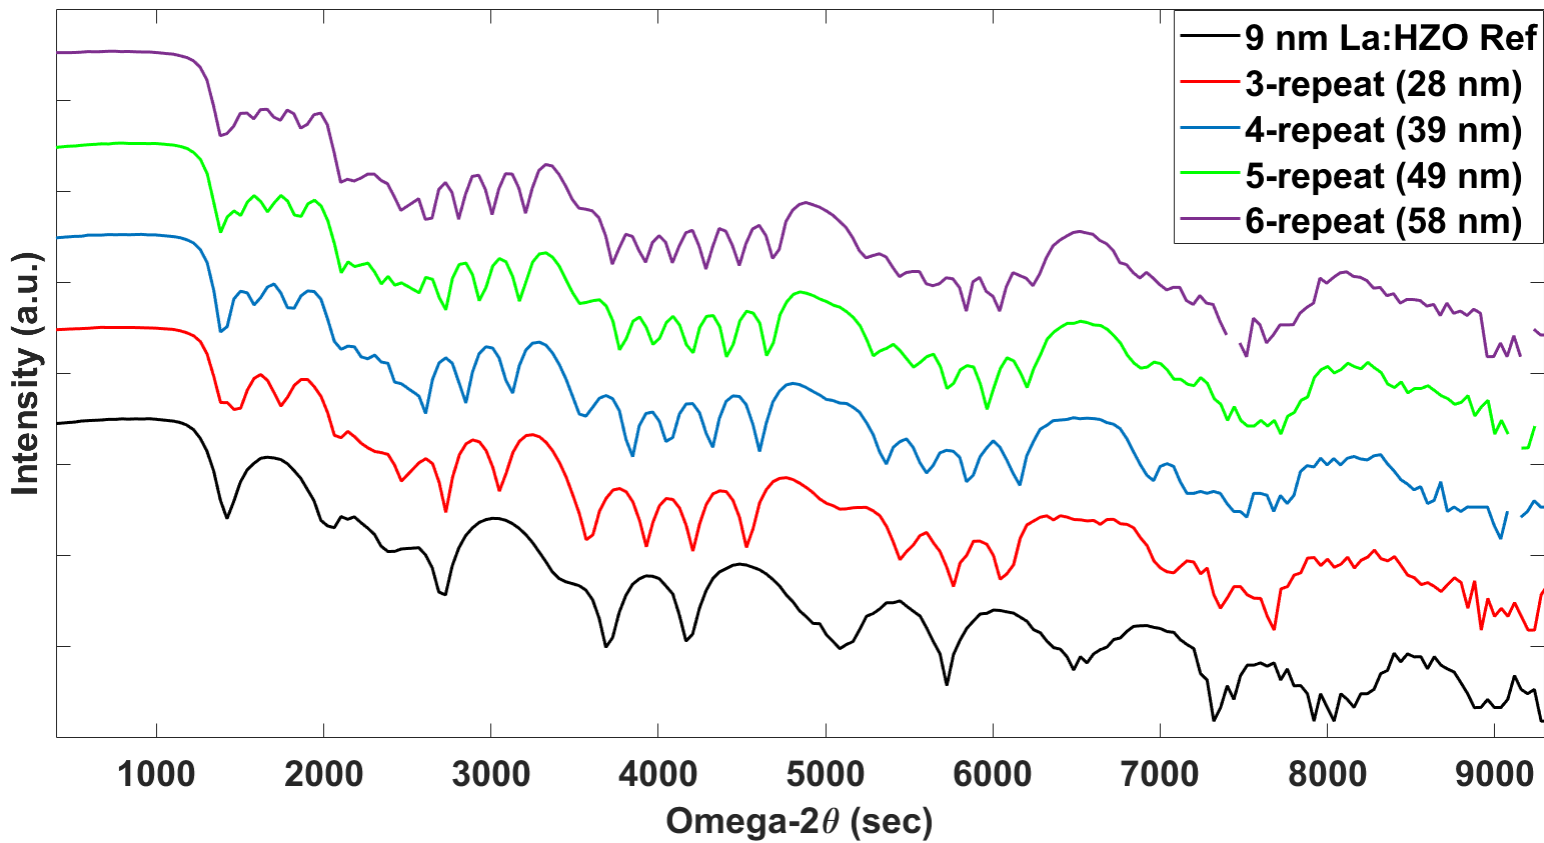

Supplement: d4nr05053c2.pdf [file d4nr05053c2.pdf]
